# Supplementary material for: Two Fe(iii)/Eu(iii) Salophen complex-based optical sensors for determination of organophosphorus pesticide monocrotophos
Source: Royal Society of Chemistry journal article supplement (doi:10.1039/d3ay00255a), 2023-01-01
Supplement: d3ay00255a1.pdf [file d3ay00255a1.pdf]

## Supporting Information

### Two Fe(III)/Eu(III) Salophen complex-based optical sensors for determination of organophosphorus pesticides monocrotophos

Qian Li<sup>a</sup>, Jing Yang<sup>b</sup>, Wenzhan Yu<sup>c</sup>, Liqiong He<sup>d</sup>, Renlong Zhou<sup>d</sup>, Changming Nie<sup>a</sup>, Lifu Liao<sup>a</sup>, Xilin Xiao<sup>\*a,e</sup>

---

<sup>a</sup>School of Chemistry and Chemical Engineering, Hunan Province Key Laboratory for the Design and Application of Actinide Complexes, University of South China, Hengyang 421001, P.R. China.

<sup>b</sup>Hengyang Market Supervision, Inspection and Testing Center, Hengyang City 421001, P.R. China.

<sup>c</sup>School of Pharmaceutical Science, Hengyang Medical School, University of South China, Hengyang 421001, PR China.

<sup>d</sup>Department of Public Health and Laboratory Science, School of Public Health, University of South China, Hengyang 421001, PR China.

<sup>e</sup>State Key Laboratory of Chemo/Biosensing and Chemometrics, Hunan University. E-mail: xiaoxl2001@163.com.

Qian Li & Jing Yang contributed equally to this work.

**Fig. S1†** <sup>1</sup>H NMR spectra (400 MHz) of (a) I-N-Sal, (b) Salophen in DMSO and (c) N-5-AF in CDCl<sub>3</sub>.

**Fig. S2†** The FT-IR spectra of (a) I-N-Sal, (b) Sigel-NH<sub>2</sub>, (c) Salophen, and (d) N-5-AF.

**Fig. S3†** The UV-vis spectra of Salophen and Salophen-Eu<sup>3+</sup> in DMSO.

**Fig. S4†** Optimization of experimental conditions of I-N-Sal reaction with MP. (a) pH, (b) I-N-Sal concentration, (c) Reaction time.

**Fig. S5†** Effect of Salophen and Sigel-NH<sub>2</sub> (a) mass ratio and (b) reaction time on the absorbance spectra.

**Fig. S6†** Effect of pH on the combination reaction of Eu<sup>3+</sup> with Sigel-NH<sub>2</sub>-Salophen particles.

**Fig. S7†** Effect of (a) the mass of ESS particles, (b) Ph, (c) reaction time on the combination reaction of MP with ESS particles.

**Fig. S8†** Effect of (a) the pH, (b) reaction time on the combination reaction of N-5-AF with ESS-MP particles.

**Fig. S9†** Effect of eluents on the elute N-5-AF-MP from particles.

**Fig. S10†** The change of RLS intensity of I-N-Sal interacting with different pesticides.

**Fig. S11†** (a) The fluorescent spectra of ESS/N-5-AF with different pesticides. (b) A competitive binding assay with ESS/N-5-AF with different pesticides.

**Fig. S12†** The possible coordination patterns between the sensor I-N-Sal and MP at the B3LYP/6-31G(d) level

**Fig. S13†** The optimized molecular structure of I-N-Sal, MP and I-N-Sal + MP

**Table S1†** Comparison of the proposed I-N-Sal and ESS/N-5-AF sensors with the previously reported sensors.

**Table S2†** The RLS analytical results of real samples in different tap water and camellia oil (n = 6).

**Table S3†** The fluorescent analytical results of real samples in different tap water and camellia oil (n = 6).

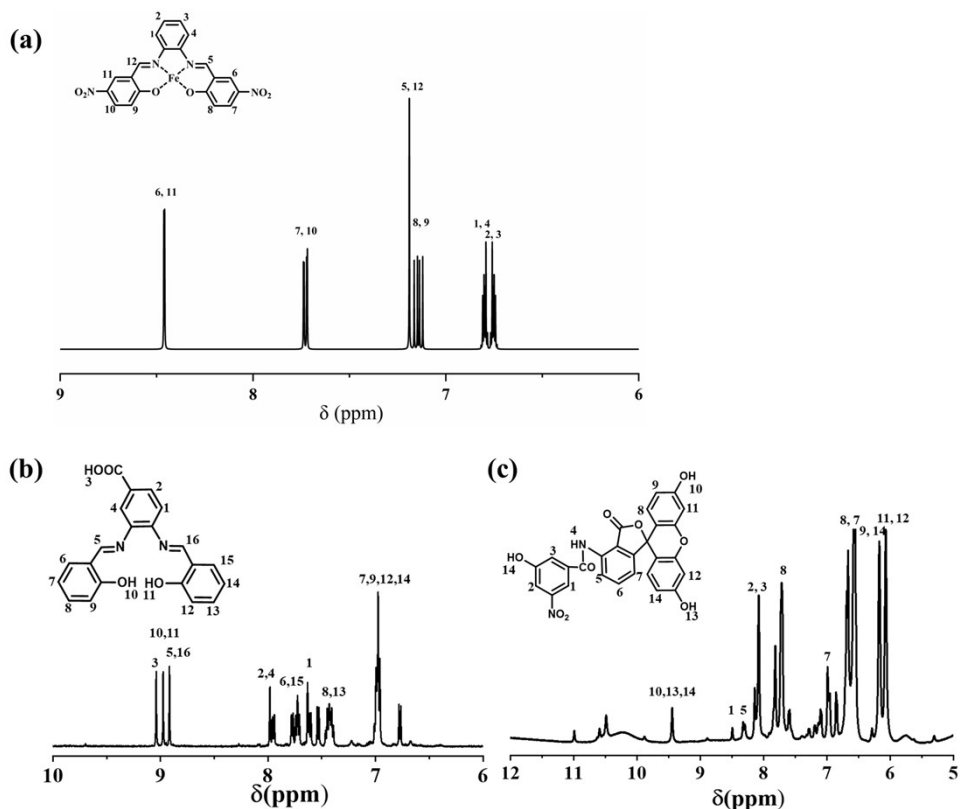

**Fig. S1†**  $^1\text{H}$  NMR spectra (400 MHz) of (a) I-N-Sal, (b) Salophen in DMSO and (c) N-5-AF in  $\text{CDCl}_3$ .

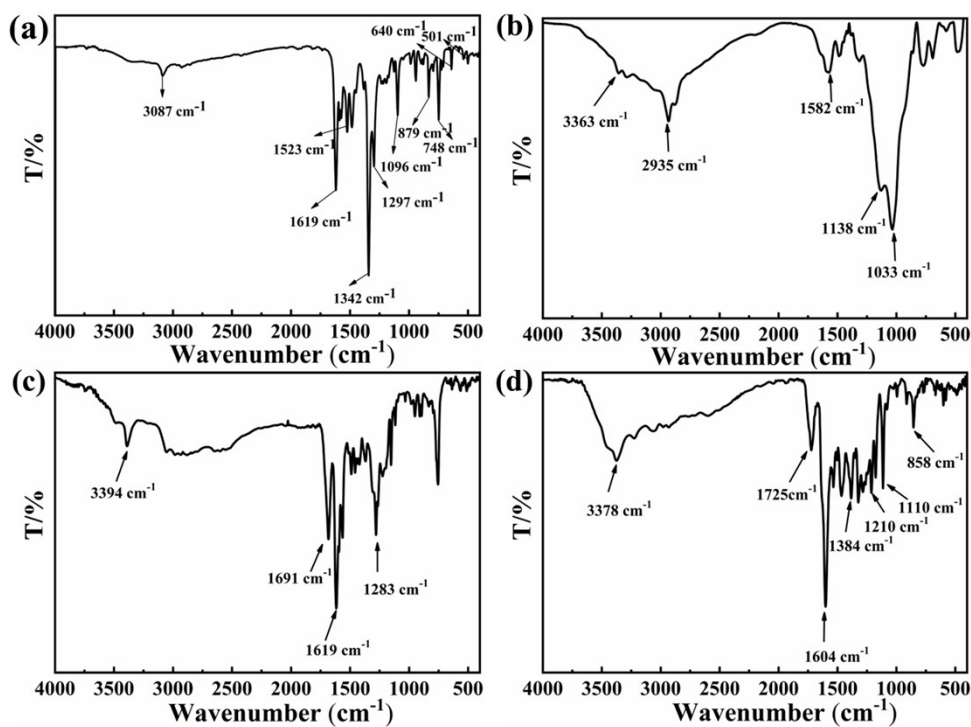

**Fig. S2†** The FT-IR spectra of (a) I-N-Sal, (b) Sigel- $\text{NH}_2$ , (c) Salophen, and (d) N-5-AF.

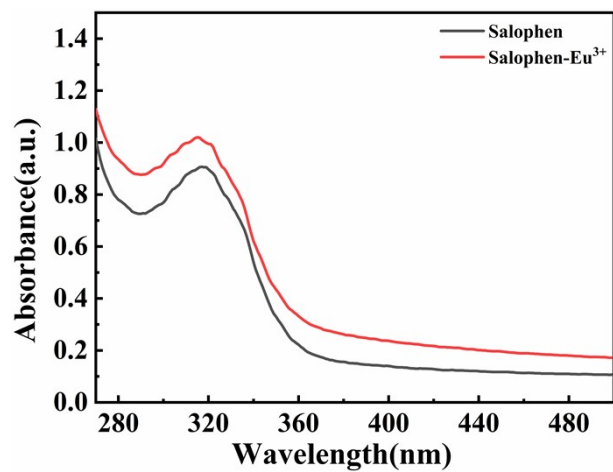

Fig. S3† The UV-vis spectra of Salophen and Salophen-Eu<sup>3+</sup> in DMSO.

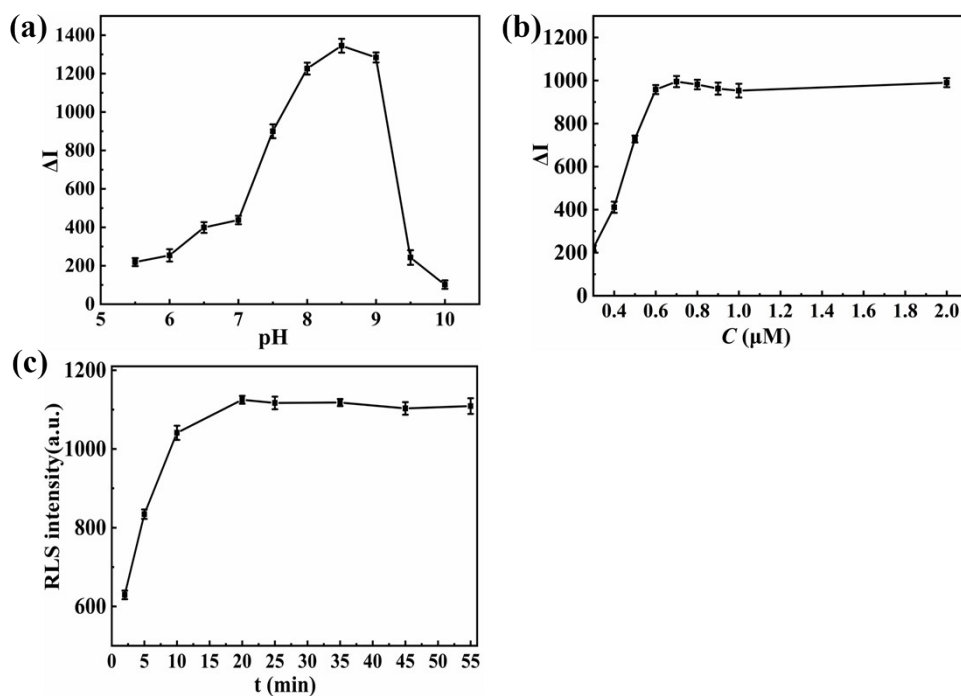

Fig. S4† Optimization of experimental conditions of I-N-Sal reaction with MP. (a) pH, (b) I-N-Sal concentration, (c) Reaction time.

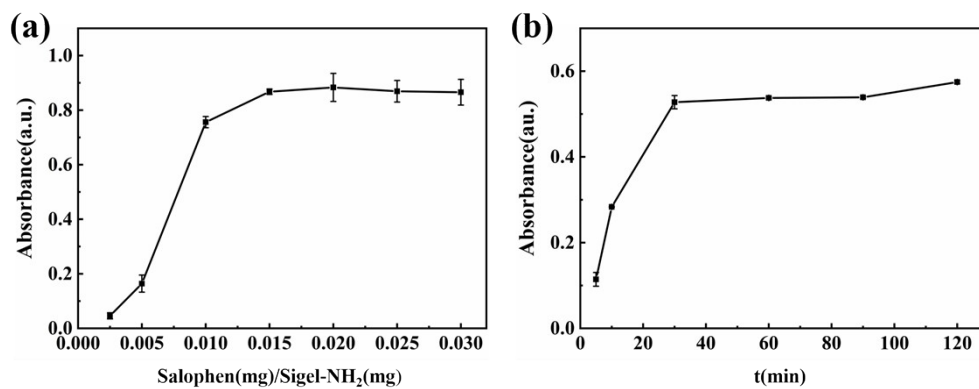

**Fig. S5†** Effect of Salophen and Sigel-NH<sub>2</sub> (a) mass ratio and (b) reaction time on the absorbance spectra.

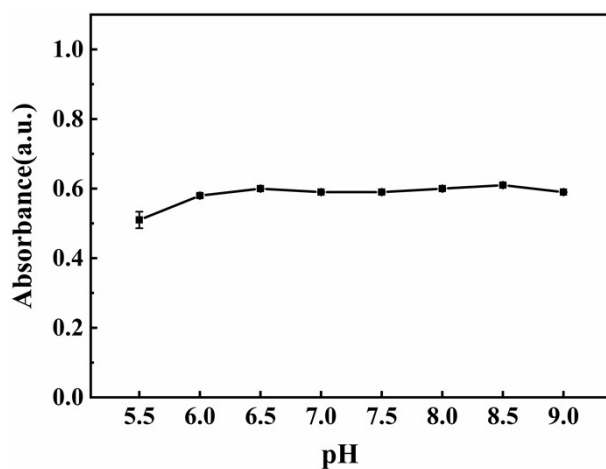

**Fig. S6†** Effect of pH on the combination reaction of Eu<sup>3+</sup> with Sigel-NH<sub>2</sub>-Salophen particles.

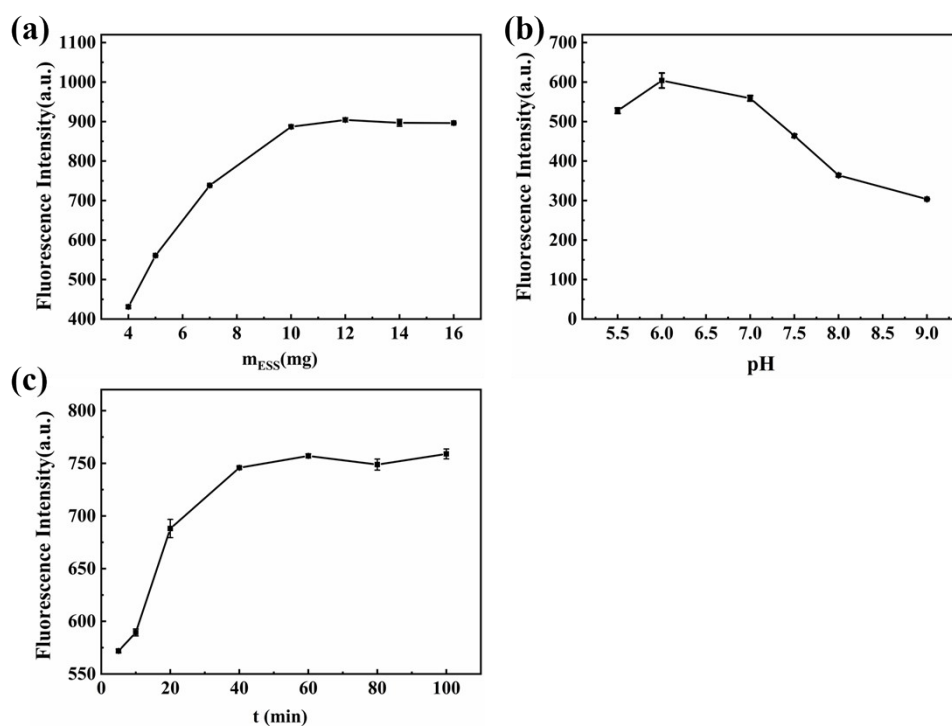

**Fig. S7†** Effect of (a) the mass of ESS particles, (b) pH, (c) reaction time on the combination reaction of MP

with ESS particles.

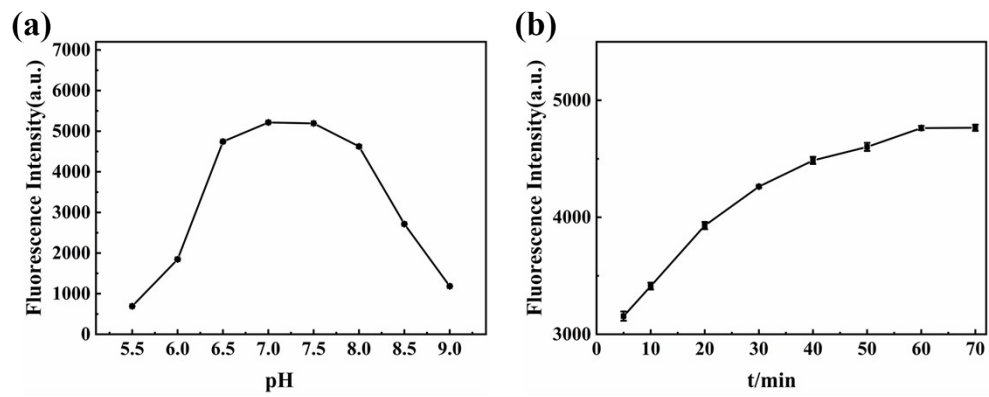

**Fig. S8†** Effect of (a) the pH, (b) reaction time on the combination reaction of N-5-AF with ESS-MP particles.

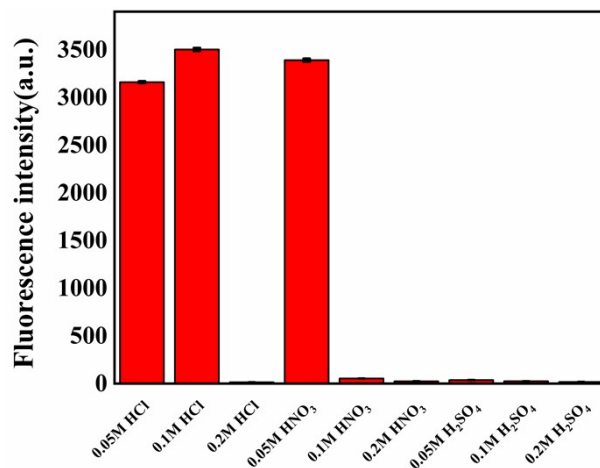

**Fig. S9†** Effect of eluents on the elute N-5-AF-MP from particles.

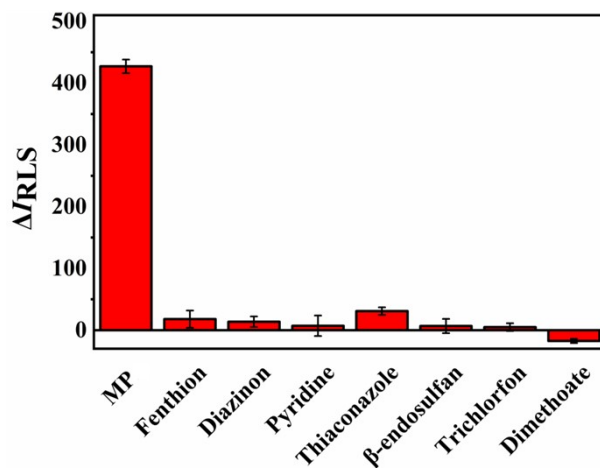

**Fig. S10†** The change of RLS intensity of I-N-Sal interacting with different pesticides. (Experimental

conditions: [MP] = 0.3  $\mu\text{M}$ ; [Fenthion, Diazinon, Pyridine, Thiaconazole,  $\beta$ -endosulfan] = 3  $\mu\text{M}$ ; [Trichlorfon, Dimethoate] = 6  $\mu\text{M}$ )

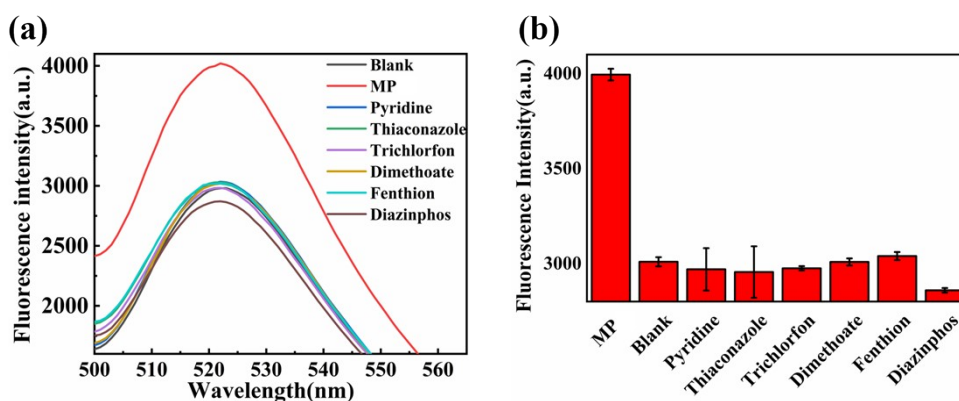

**Fig. S11†** (a) The fluorescent spectra of ESS/N-5-AF with different pesticides. (b) A competitive binding assay with ESS/N-5-AF with different pesticides. (Experimental conditions: [MP] = 3  $\mu\text{M}$ ; [Fenthion, Diazinon, Pyridine, Thiaconazole] = 30  $\mu\text{M}$ ; [Trichlorfon, Dimethoate] = 60  $\mu\text{M}$ )

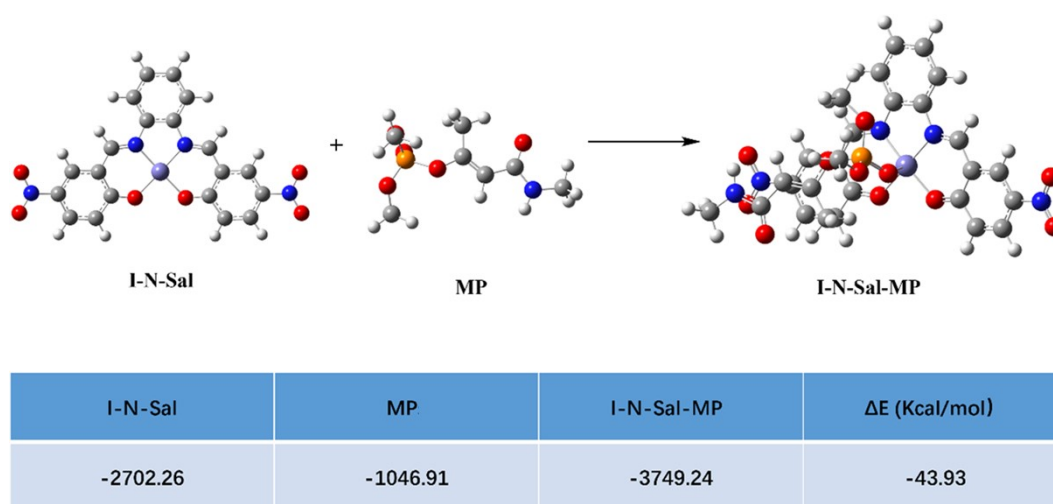

**Fig. S12†** The possible coordination patterns between the sensor I-N-Sal and MP at the B3LYP/6-31G(d) level

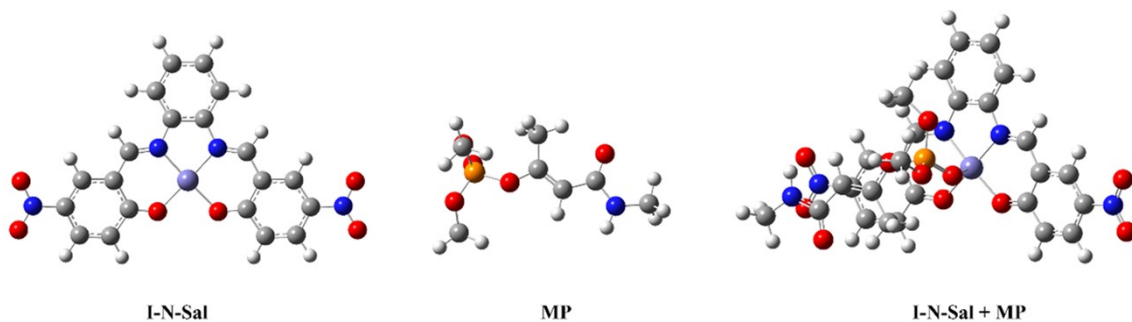

**Fig. S13†** The optimized molecular structure of I-N-Sal, MP and I-N-Sal + MP

**Table S1†** Comparison of the proposed I-N-Sal and ESS/N-5-AF sensors with the previously reported sensors.

| Functional monomer                         | Methods          | Analytes         | Linear range                                         | LOD                        | Ref.      |
|--------------------------------------------|------------------|------------------|------------------------------------------------------|----------------------------|-----------|
| Burkholderia cepacia lipase@MOF            | Electrochemistry | Methyl parathion | 0.1 – 38 $\mu\text{M}$                               | 0.067 $\mu\text{M}$        | 38        |
| AuNPs/PANI                                 | Electrochemistry | Profenofos       | 0.10 $\mu\text{M}$ – 10 $\mu\text{M}$                | 0.27 $\mu\text{M}$         | 39        |
| HP probe modified                          | Electrochemistry | Aldicarb         | –                                                    | 10 $\mu\text{M}$           | 40        |
| h-CNT-IPs/Nafion                           | Electrochemistry | Methyl parathion | 0.3–20.0 $\mu\text{M}$<br>20.0 – 150.0 $\mu\text{M}$ | 0.092 $\mu\text{M}$        | 17        |
| CS-cMWCNT-HA                               | Electrochemistry | Paraoxon         | 5.0 – 80.0 $\mu\text{M}$                             | 0.1 $\mu\text{M}$          | 41        |
| ERGO-CS/Hb                                 | Electrochemistry | Methy            | 0.076 – 0.988 $\mu\text{M}$                          | 79.77 nM                   | 42        |
| Ag nano-enzyme                             | Colorimetry      | Omethoate        | 0.1 – 10 $\mu\text{mol L}^{-1}$                      | 0.1 $\mu\text{mol L}^{-1}$ | 43        |
| FeOTiO/rGO                                 | Colorimetry      | Atrazine         | 2 – 20 $\mu\text{g L}^{-1}$                          | 2.98 $\mu\text{g L}^{-1}$  | 44        |
| TPE-1                                      | Fluorescence     | OPPs             | 0.009 – 22.5 mg/L                                    | 0.008 mg/L                 | 45        |
| PFS                                        | Fluorescence     | diazinon         | 0 – 12.5 ng mL <sup>-1</sup>                         | 0.5 ng mL <sup>-1</sup>    | 46        |
| TPE-Peptide                                | Fluorescence     | Methyl parathion | 1 – 100 $\mu\text{M}$                                | –                          | 47        |
| Eu (III)-bis (Coumarin-3 carboxylic acid)  | Fluorescence     | Phosdrin         | 1.0-8 $\mu\text{M}$                                  | 6.28 $\mu\text{M}$         | 48        |
| Tb (III)-bis (Coumarin-3- carboxylic acid) | Fluorescence     | Phosdrin         | 6.28-100 $\mu\text{M}$                               | 1.07 $\mu\text{M}$         | 48        |
| I-N-Sal                                    | RLS              | monocrotophos    | 0.1 – 1.1 $\mu\text{M}$                              | 30 nM                      | This work |
| ESS/N-5-AF                                 | Fluorescence     | monocrotophos    | 1.3 – 7.0 $\mu\text{M}$                              | 0.4 $\mu\text{M}$          | This work |

**Table S2†** The RLS analytical results of real samples in different tap water and camellia oil (n = 6).

| Sample         | RLS found<br>( $\mu\text{M}$ ) | Spike<br>( $\mu\text{M}$ ) | Total found<br>( $\mu\text{M}$ ) | RSD<br>(%) | Recovery<br>(%) |
|----------------|--------------------------------|----------------------------|----------------------------------|------------|-----------------|
| Tap water 1    | –                              | 0.300                      | 0.290                            | 3.4        | 98.0            |
| Tap water 2    | –                              | 0.300                      | 0.310                            | 2.4        | 102.7           |
| camellia oil 1 | –                              | 0.300                      | 0.297                            | 2.2        | 99.1            |
| camellia oil 2 | –                              | 0.300                      | 0.307                            | 2.9        | 102.3           |
| camellia oil 3 | –                              | 0.300                      | 0.309                            | 1.5        | 103.0           |
| camellia oil 4 | –                              | 0.300                      | 0.292                            | 3.8        | 97.4            |
| camellia oil 5 | –                              | 0.300                      | 0.291                            | 3.1        | 97.0            |

–Not detected



**Table S3†** The fluorescent analytical results of real samples in different tap water and camellia oil (n = 6).

| Sample         | FL found<br>( $\mu\text{M}$ ) | Spike<br>( $\mu\text{M}$ ) | Total found<br>( $\mu\text{M}$ ) | RSD<br>(%) | Recovery<br>(%) |
|----------------|-------------------------------|----------------------------|----------------------------------|------------|-----------------|
| Tap water 1    | –                             | 3.00                       | 3.03                             | 4.5        | 101.1           |
| Tap water 2    | –                             | 3.00                       | 2.90                             | 3.8        | 96.6            |
| camellia oil 1 | –                             | 3.00                       | 2.98                             | 2.0        | 99.3            |
| camellia oil 2 | –                             | 3.00                       | 2.93                             | 3.8        | 97.8            |

–Not detected
